# Supplementary material for: Physiologically Based Pharmacokinetic Models for Adults and Children Reveal a Role of Intracellular Tubulin Binding in Vincristine Disposition
Source: PubMed Central journal article supplement — CPT Pharmacometrics Syst Pharmacol. 2019 Aug 30;8(10):759–68. doi: 10.1002/psp4.12453 (PMC6813170; doi:10.1002/psp4.12453), 2019-08-30
Supplement: PSP4-8-759-s001.pdf [file PSP4-8-759-s001.pdf]

**Table S1. Vincristine Compound File (PK Sim 7.3.0.42)**

| <b>Basic Physico-chemistry</b>          |                                                                                        |
|-----------------------------------------|----------------------------------------------------------------------------------------|
| Is small molecule                       | Yes                                                                                    |
| Molecular Weight                        | 824.96 g/mol                                                                           |
| Effective Molecular Weight              | 824.96 g/mol                                                                           |
| pKa value                               | 5                                                                                      |
| Compound Type                           | Acid                                                                                   |
| Lipophilicity                           | 2.82                                                                                   |
| Fraction Unbound                        | 0.51 (Human)                                                                           |
| Solubility                              | 2.27                                                                                   |
| Solubility Reference pH                 | 7.00                                                                                   |
| Solubility gain per charge              | 1000.00                                                                                |
| <b>Absorption</b>                       |                                                                                        |
| Specific Intestinal Permeability        | $7.93 \times 10^{-7}$                                                                  |
| Specific Organ Permeability             | $6.03 \times 10^{-5}$                                                                  |
| <b>Distribution</b>                     |                                                                                        |
| Partition Coefficients                  | Schmitt                                                                                |
| Cellular Permeabilities                 | PK-Sim Standard                                                                        |
| Specific binding                        |                                                                                        |
| $k_{off}$                               | $1.93 \times 10^{-3}$ 1/s                                                              |
| $K_D$                                   | 0.05 $\mu$ mol/L                                                                       |
| <b>Metabolism</b>                       |                                                                                        |
| CYP3A4                                  |                                                                                        |
| Process Type                            | In vitro metabolic rate in the presence of recombinant CYPs/enzymes - Michaelis-Menten |
| In vitro $V_{max}$ / recombinant enzyme | 0.90 pmol/min/pmol rec. enzyme                                                         |
| $K_m$                                   | 19.70 $\mu$ mol/L                                                                      |
| $k_{cat}$                               | 0.90 1/min                                                                             |
| CYP3A5                                  |                                                                                        |
| Process Type                            | In vitro metabolic rate in the presence of recombinant CYPs/enzymes - Michaelis-Menten |
| In vitro $V_{max}$ / recombinant enzyme | 8.10 pmol/min/pmol rec. enzyme                                                         |
| $K_m$                                   | 14.30 $\mu$ mol/L                                                                      |
| $k_{cat}$                               | 8.10 1/min                                                                             |
| <b>Transport and Excretion</b>          |                                                                                        |
| ABCB1                                   |                                                                                        |
| Process Type                            | Specific active transport – Michaelis-Menten                                           |
| Transporter concentration               | 1.00 $\mu$ mol/L                                                                       |
| $V_{max}$                               | 416.10 pmol/mL/min                                                                     |
| $K_m$                                   | 17.10 $\mu$ mol/L                                                                      |
| $k_{cat}$                               | 0.42 1/min                                                                             |
